# Supplementary material for: Biological Characteristics of a Menadione-dependent Staphylococcus aureus Small Colony Variant (SCV) from Bovine Mastitis and Heme Promotion of Biofilm Formation
Source: Research Square preprint supplement (doi:10.21203/rs.3.rs-7699109/v1), 2025-10-14
Supplement: Supplementary file 1 [file 15af906e20af4e4a12f62854.xlsx]

## Sheet: Table 1 Mannitol Operon Primers
引物名称	引物序列
q-mtlA-F	GTATCATCGCAGCAACAG
q-mtlA-R	TGGTCGGTCTTCTTCATT
q-mtlR-F	CATTGCTGGCGCAGATTC
q-mtlR-R	TGGCTCCTTGGCTTGTAT
q-mtlF-F	CAATTCCTCCATGGCACAG
q-mtlF-R	CAGCGATTCCCACTACAA
q-mtlD-F	CGTGGTTTCATTGGTTAT
q-mtlD-R	GTCGTTGTTTTAGACTCATC
q-gmk-F	TAAAGATACAATGGACGAAG
q-gmk-R	AAAAGAATCGTGGAGGTT

## Sheet: Table 2 Mutations sites of naph
	Base			Amino acid
Gene	Location	3-1	3-1-S	Location	3-1	3-1-S
menA	664	G	A	222	G	S
menB	300	G	A
	456	A	G
	514	C	T
	561	C	T
	588	T	G	196	D	E
	649	T	G
	727	T	C
menC	117	C	T
	123	A	G
	127	G	A	43	A	R
	128	C	G
	186	C	T
	408	A	G
	482	A	T	161	E	V
	532	C	T	178	R	C
	621	A	C	207	E	D
	648	A	T
	651	C	T
	654	T	A
	667	A	G
	673	G	A
	678	T	C	226	L	S
	719	T	C	240	V	A
	733	G	A
	795	C	T	265	A	V
	801	G	T
	838	C	T
menD	180	A	G
	222	C	T
	442	A	G	148	N	D
	549	G	A
	699	A	G
	763	G	A	255	D	N
	846	G	A
	943	T	G
	948	G	A
	975	A	G
	990	A	G
	1012	C	A	338	I	V
	1013	A	G
	1015	C	T
	1047	T	C	349	C	R
	1318	G	A
menF	75	G	A
	519	T	A
	573	A	G
	831	A	T
	842	T	C	281	I	T
	853	T	C
	1110	A	G
menG	381	G	A
	535	G	A
	633	G	A
	662	A	T	221	Y	F
menH	230	G	A	77	E	K
	251	T	C
	342	C	T	114	T	M
	495	C	T
	557	A	G	186	I	V
	763	G	T	255	A	S
menE	93	T	C
	189	T	A
	207	T	A
	216	A	－
	217	A	－
	218	T	－
	219	T	－
	220	G	－
	221	C	－
	222	A	－
	223	A	－
	224	T	－
	225	G	－
	226	A	－
	227	T	－
	228	T	－
	229	A	－
	230	A	－
	231	T	－
	232	A	－
	233	C	－
	234	A	－
	235	A	－
	236	G	－
	237	A	－
	238	T	－
	239	T	－
	240	G	－
	241	A	－
	242	C	－
	243	A	－
	244	C	－
	245	C	－
	246	T	－
	247	A	－
	248	A	－
	249	T	－
	250	G	－
	251	A	－
	252	G	－
	253	A	－
	254	T	－
	255	G	－
	256	A	－
	257	C	－
	258	G	－
	259	A	－
	260	A	－
	261	T	－
	262	C	－
	263	A	－
	264	G	－
	265	A	－
	266	T	－
	267	G	－
	268	A	－
	269	G	－
	270	G	－
	271	T	－
	272	C	－
	273	A	－
	274	A	－
	275	T	－
	276	T	－
	277	G	－
	278	A	－
	279	T	－
	280	G	－
	281	T	－
	282	G	－
	283	C	－
	284	A	－
	285	A	－
	286	T	－
	287	T	－
	288	G	－
	289	A	－
	290	T	－
	291	T	－
	292	A	－
	293	T	－
	294	T	－
	295	T	－
	296	G	－
	297	C	－
	298	A	－
	299	C	－
	300	C	－
	301	T	－
	302	T	－
	303	A	－
	304	C	－
	305	C	－
	306	C	－
	307	C	－
	308	T	－
	309	G	－
	310	G	－
